# Supplementary material
Source: PubMed Central journal article supplement (PMC6256786)
Supplement: zac012187682s1.pdf [file zac012187682s1.pdf]

## SUPPLEMENTAL MATERIAL

Drug repurposing for *Leishmania*. Molecular basis of the leishmanicidal activity of the antidepressant sertraline.

Marta L. Lima<sup>a,b,c</sup>, María A. Abengózar<sup>a</sup>, Montserrat Nácher-Vázquez<sup>a</sup>, María P. Martínez-Alcázar<sup>b</sup>, Coral Barbas<sup>b</sup>, Andre G. Tempone<sup>c</sup>, Ángeles López-González<sup>b#</sup>, Luis Rivas<sup>a#</sup>

### Index for supplemental material

|                                                                                                                                                                          |           |
|--------------------------------------------------------------------------------------------------------------------------------------------------------------------------|-----------|
| <b>1.-Material and methods for metabolomic studies</b> .....                                                                                                             | <b>2</b>  |
| 1.1- Preparation of samples for metabolomic studies. ....                                                                                                                | 2         |
| 1.2- LC-MS fingerprinting. ....                                                                                                                                          | 3         |
| 1.3- CE-MS analysis. ....                                                                                                                                                | 3         |
| 1.4- Quality Controls (QCs). ....                                                                                                                                        | 4         |
| 1.5- Data set creation.....                                                                                                                                              | 5         |
| 1.7- Data treatment.....                                                                                                                                                 | 5         |
| 1.8- Statistical analysis.....                                                                                                                                           | 6         |
| 1.9- Identification.....                                                                                                                                                 | 6         |
| <b>2.- Supplementary results for metabolomic studies</b> .....                                                                                                           | <b>7</b>  |
| 2.1- Analytical validation of untargeted metabolomics analyses.....                                                                                                      | 7         |
| <b>REFERENCES</b> .....                                                                                                                                                  | <b>8</b>  |
| <b>3.- Supplementary Figures S1-S6</b> .....                                                                                                                             | <b>9</b>  |
| Figure S1. Cytofluorometric analysis of Rhodamine 123 accumulation in <i>Leishmania. pifanoi</i> axenic amastigotes and its inhibition by sertraline.....                | 9         |
| Figure S2- Morphological damage to <i>L. infantum</i> promastigote mitochondrion caused by sertraline.....                                                               | 10        |
| Figure S3. Constructions of PCA models. ....                                                                                                                             | 11        |
| Figure S4. PLS-DA models built for untreated vs. treated parasites.....                                                                                                  | 12        |
| Figure S5. Main metabolic pathways disturbed in <i>L. infantum</i> promastigotes by sertraline treatment.....                                                            | 13        |
| Figure S6.- Schematic representation of the leishmanicidal mechanism of sertraline.....                                                                                  | 15        |
| <b>Table S1. Features detected and identified as changed by SRT treatment of <i>L. infantum</i> promastigotes at different steps of the statistical selection.</b> ..... | <b>17</b> |

|                                                                                                                                  |           |
|----------------------------------------------------------------------------------------------------------------------------------|-----------|
| <b>Table S2. Compounds identified with statistical significance and their variation tendency with sertraline treatment. ....</b> | <b>18</b> |
| <b>Table S2. Compounds identified with statistical significance and their variation tendency with sertraline treatment. ....</b> | <b>19</b> |
| <b>Table S2. Compounds identified with statistical significance and their variation tendency with sertraline treatment. ....</b> | <b>20</b> |
| <b>Table S2. Compounds identified with statistical significance and their variation tendency with sertraline treatment. ....</b> | <b>21</b> |
| <b>Table S2. Compounds identified with statistical significance and their variation tendency with sertraline treatment. ....</b> | <b>22</b> |

## **1.-Material and methods for metabolomic studies**

### **1.1- Preparation of samples for metabolomic studies.**

*Leishmania infantum* promastigotes (strain JPC) were grown in RPMI 1640 + HIFCS at 26°C and harvested at a mid-exponential phase ( $8 \times 10^6$  promastigotes/ml). Then, promastigotes were incubated for 12 h under these conditions with 35  $\mu$ M of SRT, equivalent to its IC<sub>70</sub> for MTT reduction under these conditions. Once collected, parasites were immediately washed twice with chilled HBSS buffer, and frozen in liquid N<sub>2</sub> ( $4 \times 10^7$  promastigotes per aliquot). Parasites were kept at -80°C until analysis. Six replicates of each group were used for all the analytical techniques employed.

Metabolite extraction was carried out by addition of 350  $\mu$ l MeOH:H<sub>2</sub>O 4:1 (vol:vol) at 4°C to each replicate. Afterwards, disruption of the samples was carried out by shaking in a TissueLyser LT (Qiagen, Germany) (25 mg glass beads acid-water 426-660  $\mu$ m, 10 min, 50Hz) plus four freeze-thawing cycles in liquid N<sub>2</sub>. Insoluble material was removed by centrifugation ( $15,700 \times g$ , 10 min, 4°C).

### **1.2- LC-MS fingerprinting.**

*Leishmania* extracts were filtered through 0.22 µm MS® nylon filter and analyzed in an LC system (Agilent 1200 Series HPLC), coupled to a QTOF (quadrupole time-of-flight) (6520, Agilent), controlled by Mass Hunter Workstation Data Acquisition (B.04.00, Agilent), used at both polarities, ESI+ and ESI- to broaden the variety of metabolite ions detected. Briefly, 10 µl of sample were injected into a reverse-phase column at 40°C (Supelco Discovery HS, C18, 150 × 2.1 mm internal diameter, 3.0 µm, Bellefonte, PA, USA), flow rate: 0.6 ml/min; mobile phase: A = 0.1 % (vol:vol) formic acid; B = 0.1 % (vol:vol) formic acid in acetonitrile; gradient: 25 to 95% B in 40 min. The QTOF system was operated in positive and negative Dual Electrospray Ionization mode in full scan from m/z 50 to 1000 at a rate 1.0 spectrum per second. Electrospray conditions were: capillary voltage 3000 V for positive and 4000 V for negative ionization mode; drying gas at 330°C and flow rate of 10.5 ml/min; nebulizer pressure 26 psi; fragmentor 175 V; octopole 750 V; skimmer 65 V. During the analysis two reference masses (purine (C<sub>5</sub>H<sub>4</sub>N<sub>4</sub>) and hexakis (1H, 1H, 3H-tetrafluoropropoxy) phosphazine (C<sub>18</sub>H<sub>18</sub>O<sub>6</sub>N<sub>3</sub>P<sub>3</sub>F<sub>24</sub>), (HP-0921)) were used to allow constant mass correction: 121.0509 – purine and 922.0098 – (HP-0921) in positive ESI mode; and 119.0363 m/z (proton abstracted purine) and 966.0007 m/z (formate adduct of HP-0921) in negative ion mode. Samples were analyzed in randomized two runs (first for positive and second for negative ion mode) and maintained in an autosampler at 4°C.

### **1.3- CE-MS analysis.**

One hundred and twenty microliters of the metabolic extracts were dried and resuspended in 120 µl Milli-Q H<sub>2</sub>O containing 0.2 mM methionine sulfone as internal standard and 0.1 M formic acid. Samples were centrifuged (15,700 × g, 10 min, 4°C) and analyzed by CE-

MS in a 7100 Agilent system, coupled to a 6224 Agilent TOF Mass Spectrometer, controlled by ChemStation software (B.04.03, Agilent) and MS mode by Mass Hunter Workstation Data Analysis (B.02.01, Agilent). The separation occurred in a fused-silica capillary (total length, 100 cm; 50  $\mu$ m internal diameter, Agilent). Separations were carried out in normal polarity with a 0.8 M formic acid in 10 % methanol (vol:vol) as background electrolyte at 20°C. Before each analysis, the capillary was conditioned by flushing the background electrolyte for 5 min (950 mbars). The sheath liquid (6  $\mu$ l/min) was MeOH/water (1/1, vol:vol) containing 1.0 mM formic acid with two reference masses: 121.0509 – purine and 922.0098 – and HP-0921 (C<sub>18</sub>H<sub>18</sub>O<sub>6</sub>N<sub>3</sub>P<sub>3</sub>F<sub>24</sub>,HP-0921). Samples were hydrodynamically injected at 50 mbar for 50 s. Stacking was carried out by applying the background electrolyte at 100 mbar for 10 s. The separation voltage was 30 kV with 25 mbar of internal pressure and the analyses were carried out in 30 min. The optimized MS parameters were: fragmentor, 100 V; skimmer, 65 V; octopole 750 V; nebulizer pressure, 10 psi; drying gas, 200°C, 12.0 ml/min. The capillary voltage was 3500 V. Data were acquired in positive Dual-ESI mode with a full scan from m/z 80 to 1000, at a rate of 1.02 scan/s.

#### **1.4- Quality Controls (QCs).**

Regardless of the technique used, QCs were prepared by pooling equal volumes of all the samples, and analyzed throughout the run. The analytical runs were set up starting with minimum of five QCs followed by the samples; a QC sample was injected in between blocks of six samples until the end of the run.

### **1.5- Data set creation.**

Data background noise was cleaned. The final list of features was obtained by the molecular feature extraction (MFE) tool in the Mass Hunter Qualitative Analysis software (B.06.00, Agilent). Data were reprocessed using DA Reprocessor Offline Utilities B.05.00 (Agilent) for ions such as  $[M+H]^+$ ,  $[M+Na]^+$  and  $[M+K]^+$ , neutral water loss and double charge for charge state.

### **1.6- Alignment.**

Data were aligned in MPP (Mass Profiler Professional 12.6.1, Agilent) (1). Peaks present in all samples with the same  $m/z$  and retention time (RT) were assigned to the same feature. The alignment was performed without prior RT correction. For LC-MS, filtering and alignment were set up between 0.2-36.0 min or 0.2-32.0 min in positive or negative mode respectively, with 1% for RT window and 20 ppm for mass tolerance. For CE-MS, the filtering and alignment were performed into the range 1.26 to 34.0 min applying 10% for RT window and 10 ppm for mass tolerance. Alignment was performed by restricting the number of ions and charge states defined previously during extraction of features. Each compound was described by mass, RT, and abundance.

### **1.7- Data treatment.**

After alignment, the variables were filtered in MS Excel (Microsoft Office, 2010). Data selection required their presence in more than 50% of the QCs, and a relative standard deviation (RSD) < 30% across the QCs. Principal component analysis (PCA) models were built using SIMCA-P1 software (12.0.1.0, Umetrics) to verify analytical reproducibility and stability. Hereafter, data without QCs was further filtered by masses presence in at least 66.6% of the samples in one comparison group (untreated or treated). Any missing values

were replaced by either the mean or zero for variables with a higher or lower 50% percentage in the samples of the group respectively.

### **1.8- Statistical analysis.**

Statistical significance was set at 95% level ( $P < 0.05$ ) using Mann-Whitney U test (program Matlab R2010a, version 7.10.0.499) for Univariate analysis (UVA). Principal component analysis (PCA), partial least squares regression (PLS-DA), jackknife confidence intervals, S plot and VIP scores from OPLS-DA (program Simca-P+ (12.0.1, Umetrics, Umea, Sweden) were also used to select biologically significant variables in multivariate analysis (MVA).

### **1.9- Identification.**

The resulting list of accurate masses with significant difference among groups was searched using METLIN (<http://metlin.scripps.edu>), KEGG (<http://www.genome.jp/kegg/genome.html>), and LIPIDMAPS (<http://www.lipidmaps.org/>) by the in-house developed CEU mass mediator (<http://ceumass.eps.uspceu.es/mediator>; error 10 ppm). Information from LeishCyc (<http://biocyc.org/LEISH/organisms-summary?object=LEISH>) was also used. Identification of the compounds was carried out by LC-MS/MS using identical separation conditions of the first analysis coupled to a QTOF (model 6520, Agilent). Ions were targeted by collision-induced dissociation (CID) fragmentation on the fly, according to the previously determined accurate mass and RT. Final confirmation were carried out after study of mass and isotopic distributions for the precursor and product ion of the particular compounds. Confirmation with standards was made by comparison of RT, isotopic distribution, and fragments of commercially available

reagents with those obtained in analyzed samples. For CE-MS, the samples were reanalyzed in presence of commercially available standards for metabolites confirmation.

## **2.- Supplementary results for metabolomic studies**

### **2.1- Analytical validation of untargeted metabolomics analyses.**

In all analytical platforms, tight cluster of the QCs in a well-defined area of plot demonstrates that separation into different groups was based on a real biological variability and techniques and methods possessed stability and reproducibility (Figure S2).

### **2.2- Data treatment and statistical analyses.**

Once the methodology was considered appropriate, the data matrix was further filtered out based on masses present in at least 66.6% of the samples in a specific group (untreated and treated). Any missing values were replaced accordingly to the criteria aforementioned. PLS-DA models were built to discriminate between groups, to adjust the scale of the variables and to statistically validate the difference between groups. Pareto-scaling was the closest scale to the original data ensuring a softer impact and therefore applied in further analyses. Once the biological variability between groups (untreated vs. treated) was statistically supported by cross-validation analysis in PLS-DA models, metabolites responsible for this variation were discriminated by jackknife confidence intervals from OPLS-DA models in MVA analysis. For UVA, Mann-Whitney U test was applied. The full list of identified compounds was compiled in Table S2.

In order to enable comparison between techniques, the metabolite abundances were normalized dividing the mean-centered abundance of each metabolite by the corresponding

standard deviation (2). The normalized data were represented in heatmap (Figure 7, main text) grouped according to their biochemical nature (Figure 8, main text).

## REFERENCES

1. Godzien J, Ciborowski M, Angulo S, Barbas C. 2013. From numbers to a biological sense: How the strategy chosen for metabolomics data treatment may affect final results. A practical example based on urine fingerprints obtained by LC-MS. *Electrophoresis* 34:2812-2826. DOI: 10.1002/elps.201300053
2. Xia J, Sinelnikov IV, Han B, Wishart DS. 2015. MetaboAnalyst 3.0--making metabolomics more meaningful. *Nucleic Acids Res* 43:W251-W257. DOI: 10.1093/nar/gkv380



### 3.- Supplementary Figures S1-S6.

**Figure S1. Cytofluorometric analysis of Rhodamine 123 accumulation in *Leishmania pifanoi* axenic amastigotes and its inhibition by sertraline.**

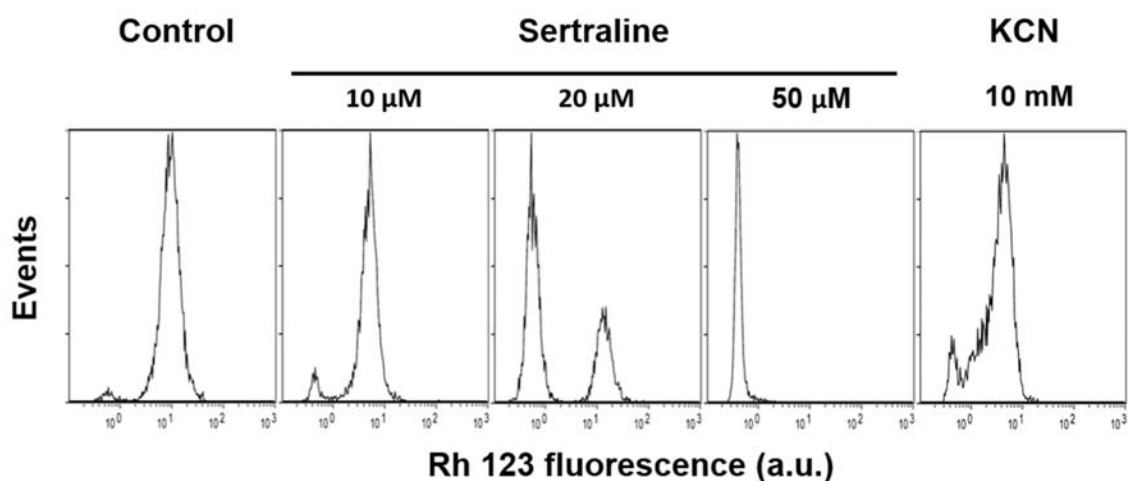

**Figure S1- Cytofluorometric analysis of rhodamine 123 (Rh123) accumulation in *L. pifanoi* axenic amastigotes and its inhibition by sertraline.** *L. pifanoi* axenic amastigotes were incubated (4h, 32°C) with different SRT concentrations as stated at the corresponding graphs. After rhodamine 123 (Rh 123) uptake (0.3 μM, 5 min, 32°C), parasites were analyzed in a Beckman Coulter FC500 MPL cytofluorometer ( $\lambda_{\text{EXC}} = 488$  nm/ $\lambda_{\text{EM}} = 520$  nm). Parasites incubated with 10 mM KCN were used as control for depolarization.

**Figure S2- Morphological damage to *L. infantum* promastigote mitochondrion caused by sertraline.**

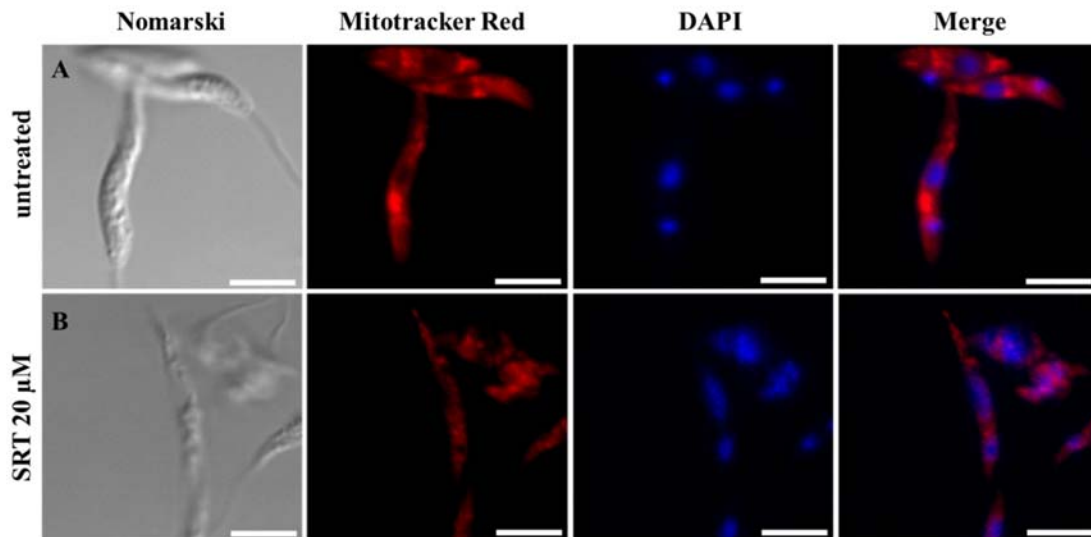

**Figure S2. Morphological damage to *Leishmania infantum* promastigote parasite mitochondrion caused by sertraline.** *L. infantum* promastigotes were stained with Mitotracker Red prior to their incubation with sertraline (SRT) at its IC<sub>50</sub> (20 μM, 4 h). Changes in the fluorescence pattern were then assessed by confocal microscopy. **(A)** Untreated promastigotes. **(B)** Promastigotes treated with sertraline. Blue and red fluorescence corresponds to nucleic acids stained with DAPI (5 μg/ml), and to the specific accumulation of Mitotracker Red (0.1 μM) inside the mitochondrion of the parasite. Fluorescence settings: DAPI, λ<sub>EXC</sub> = 358nm /λ<sub>EM</sub>= 461nm; Mitotracker Red λ<sub>EXC</sub> = 578nm /λ<sub>EM</sub>= 599nm. **Legend:** DAPI (4',6-diamidino-2-phenylindol). Magnification bar =5 μm.

**Figure S3. Constructions of PCA models.**

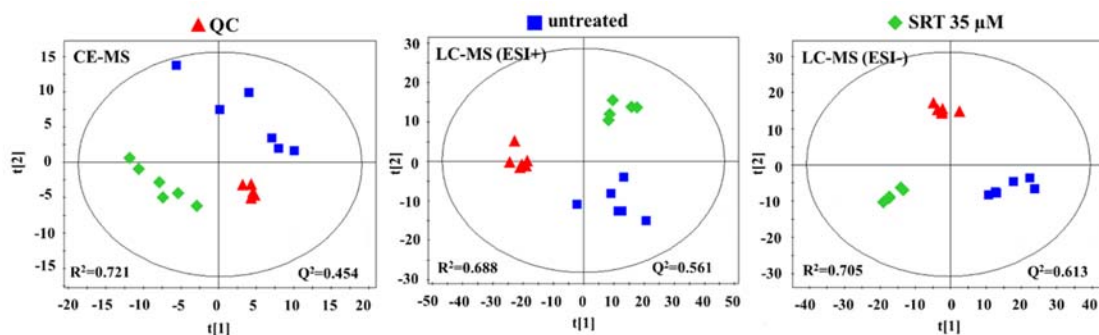

**Figure S3. Constructions of PCA models.** PCA models were built using the set of filtered data that were present in at least 50% of the QC and RSD lower than 30% across the QCs (component 1 vs. component 2 shown). CE-MS:  $R^2=0.721$ ,  $Q^2=0.454$ , 2 components. LC-MS (ESI+):  $R^2 = 0.688$ ,  $Q^2 = 0.561$ , 2 components. LC-MS (ESI-):  $R^2 = 0.705$ ,  $Q^2 = 0.613$ , 2 components.  $R^2$  = coefficient for variance explained;  $Q^2$  = coefficient for variance predicted.

Figure S4. PLS-DA models built for untreated vs. treated parasites

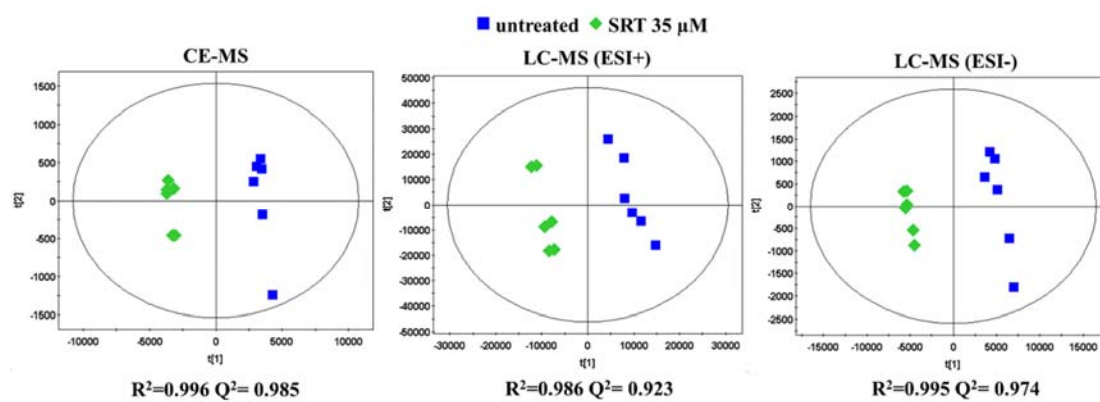

Figure S4. PLS-DA models built for untreated vs. treated. CE-MS:  $R^2=0.996$ ,  $Q^2=0.985$ , 2 components. LC-MS (ESI+):  $R^2=0.986$ ,  $Q^2=0.923$ , 2 components. LC-MS (ESI-):  $R^2=0.995$ ,  $Q^2=0.974$ , 2 components.  $R^2$  = coefficient for variance explained;  $Q^2$  = coefficient for variance predicted.

**Figure S5. Main metabolic pathways disturbed in *L. infantum* promastigotes by sertraline treatment.**

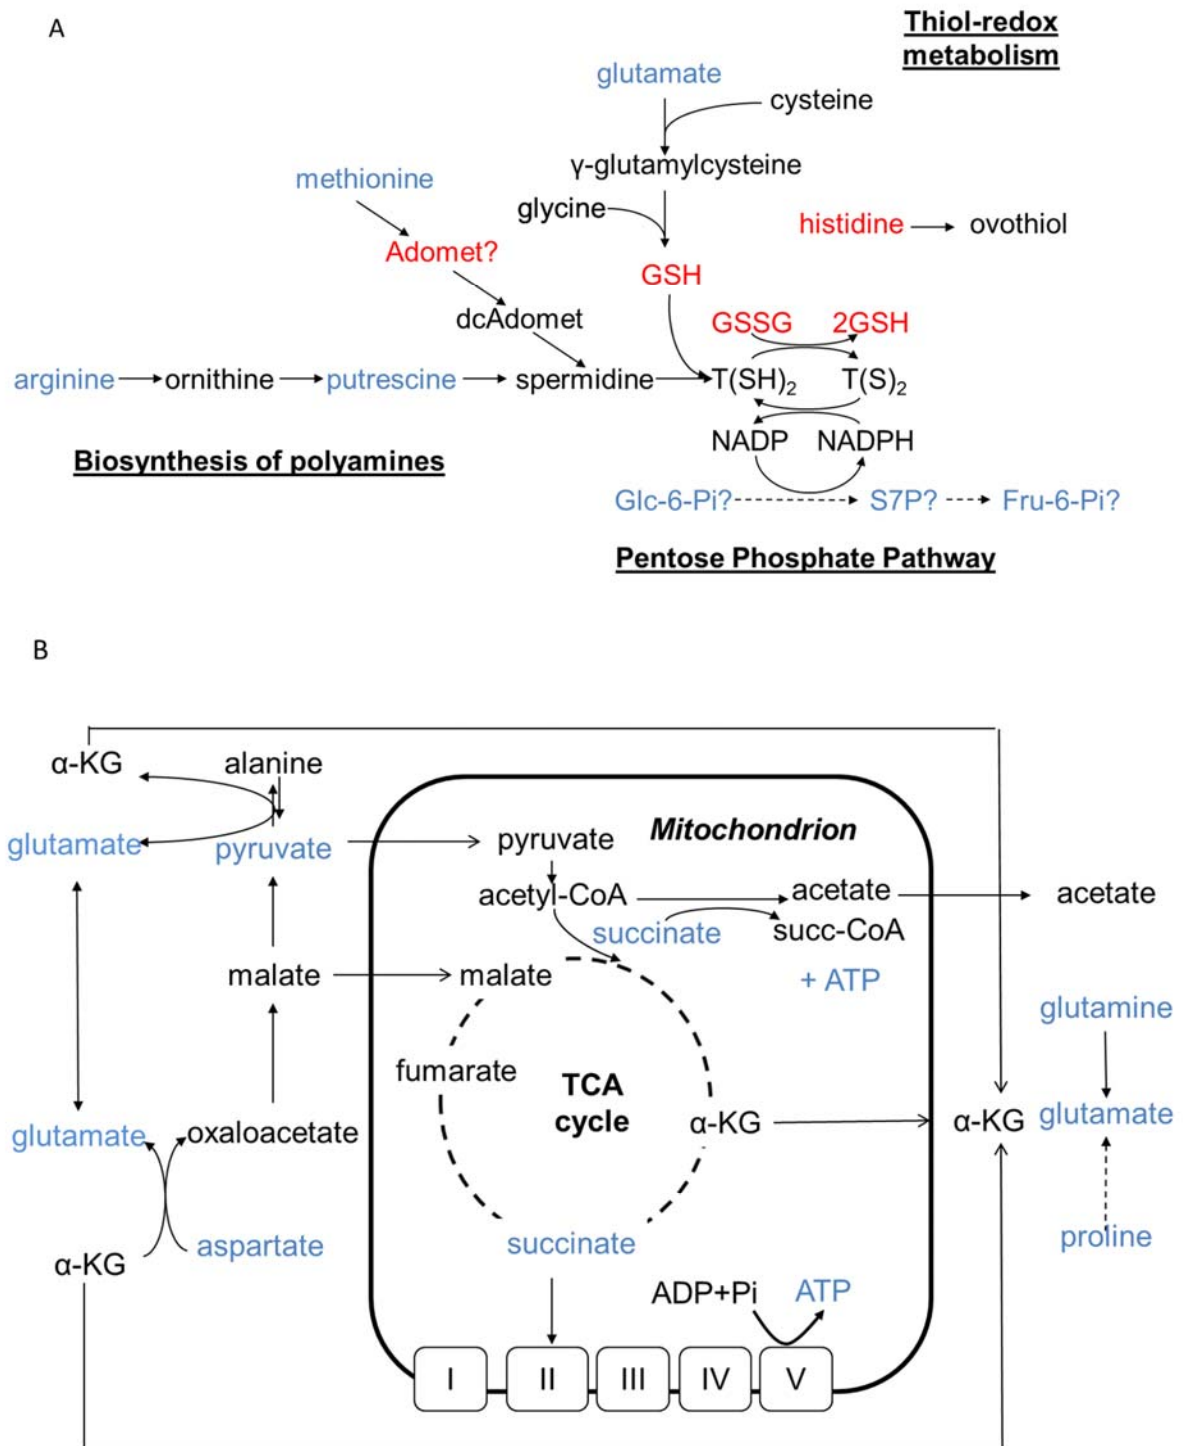

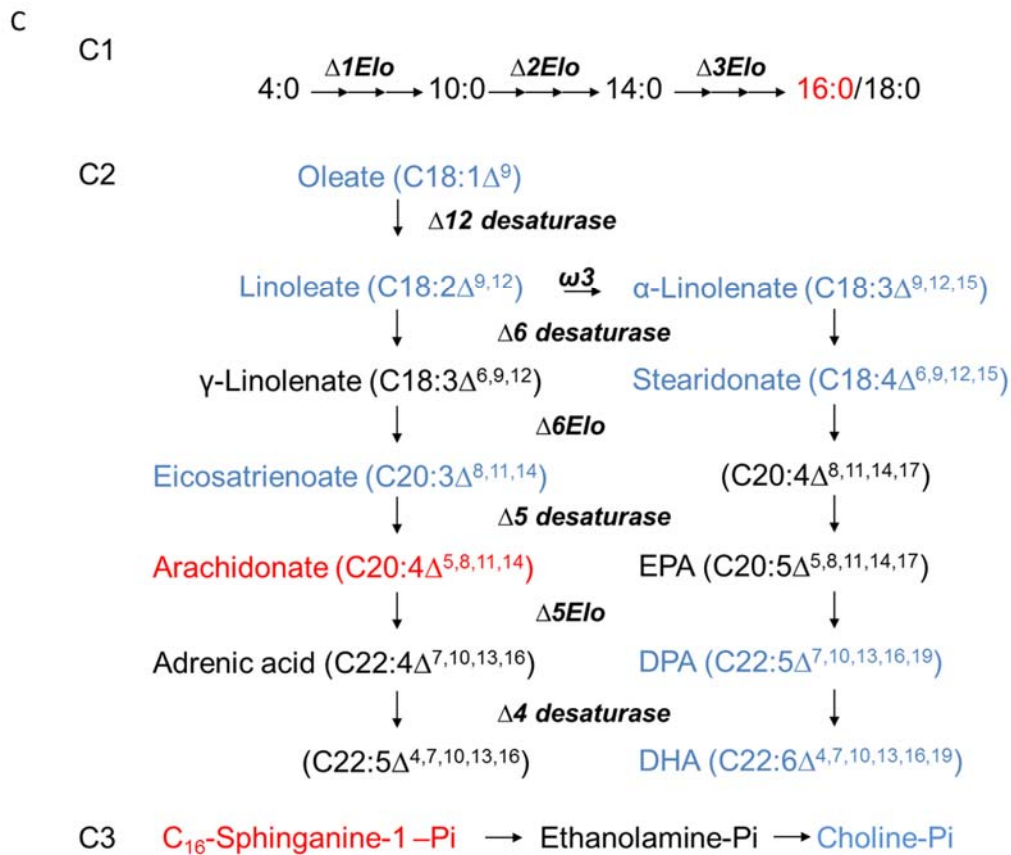

**Figure S5. Main metabolic pathways disturbed in *Leishmania infantum* promastigotes by sertraline treatment.** (A).- Biosynthesis of polyamines and the thiol-redox metabolism of sertraline treated parasites. Metabolites with an interrogation mark were arbitrarily assigned according to their molecular mass. **Legend:** Adomet, S-adenosyl methionine; dcAdomet, decarboxylated S-adenosylmethionine; Fru-6-Pi, fructose-6-phosphate Glc-6-Pi, glucose-6-phosphate, GSH, reduced glutathione; GSSG, oxidized glutathione; S7P, sedoheptulose 7 phosphate; T(SH)<sub>2</sub>, reduced trypanothione; T(S)<sub>2</sub>, oxidized trypanothione. (B).- Amino acid and bioenergetic metabolism.  $\alpha$ -KG,  $\alpha$ -ketoglutarate; Succ-CoA, succinyl-CoA. (C).- Lipid and sphingolipid metabolism. **C1.-** Elongation of fatty acids. **Legend:** *Elo*, elongase. **C2.-** Unsaturated fatty acids. **Legend:** DPA, docosapentaenoic acid, DHA, docosahexaenoic acid; EPA, eicosapentaenoic acid; **C3.-** Sphingolipid metabolism. Metabolites undergoing a rise in their levels in sertraline treated parasites were depicted in red, whereas those that decreased were in blue.

**Figure S6.- Schematic representation of the leishmanicidal mechanism of sertraline.**

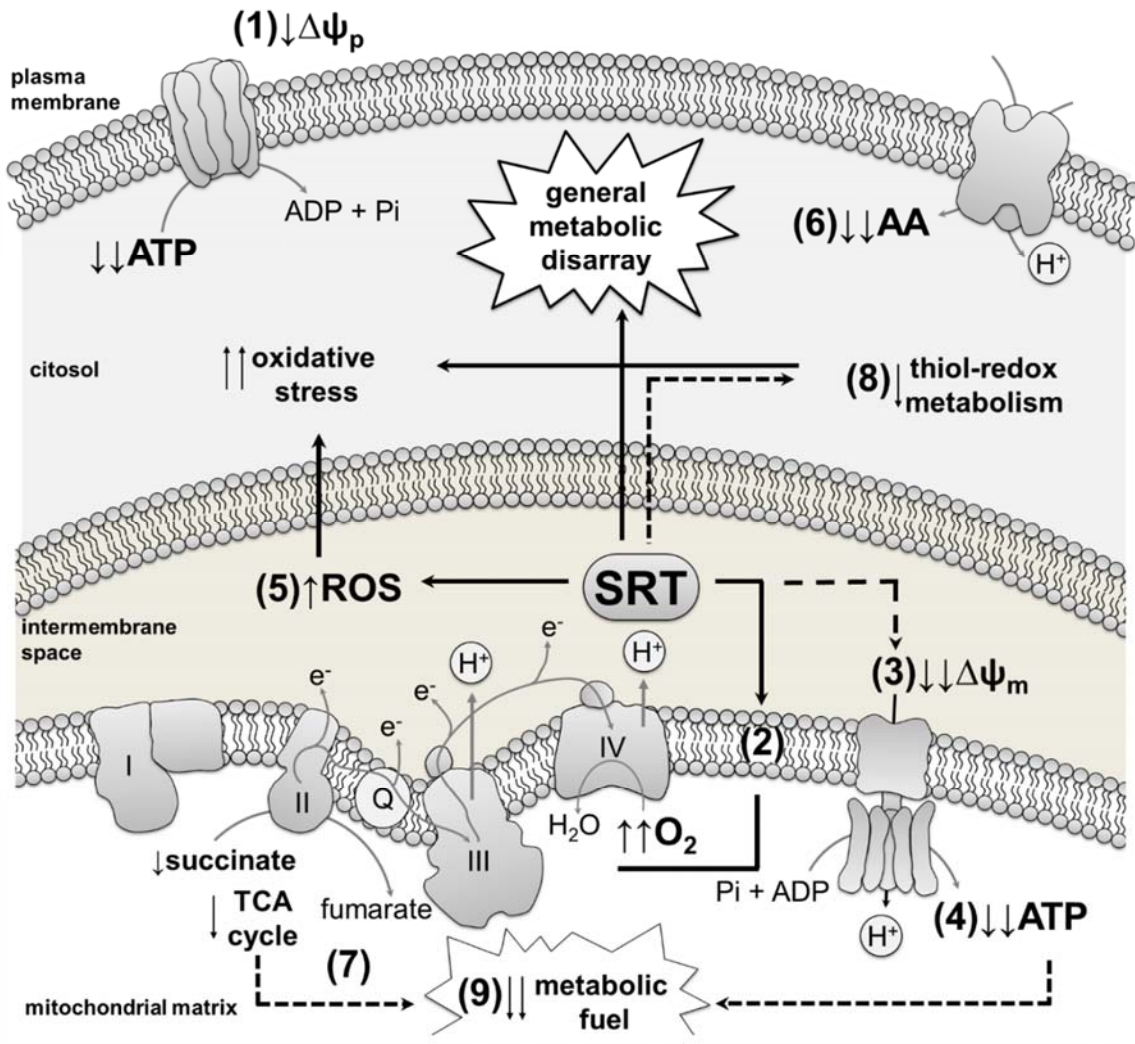

**Figure S6.-.Schematic representation of the leishmanicidal mechanism of sertraline.** Sertraline (SRT) crosses and depolarizes the plasma membrane causing (1) a transient depolarization of the plasma membrane. Once inside the parasite, SRT induces uncoupling of the respiratory chain (2), collapse of  $\Delta\psi_m$  (3), with inhibition of ATP synthesis ensuing (4), and increase of mitochondrial ROS production (5). These two initial effects were progressively aggravated first, by the decrease of the intracellular pool of amino acids (6) and other TCA intermediates pool (7), and secondly by the impairment of the thiol-redox and polyamine metabolism (8). This, together with the crippled energy metabolism of the

parasite (9) ended up with a general and irreversible metabolic disarray, lethal to the parasite. Solid and dashed arrows stand for increase or decrease of the respective effect



**Table S1. Features detected and identified as changed by SRT treatment of *L. infantum* promastigotes at different steps of the statistical selection.**

| Analytical technique | After alignment | After filtering | Statistical significant |
|----------------------|-----------------|-----------------|-------------------------|
| CE-MS                | 1128            | 130             | 38                      |
| LC-MS(ESI+)          | 7276            | 543             | 210                     |
| LC-MS(ESI-)          | 3043            | 478             | 337                     |

**Table S2. Compounds identified with statistical significance and their variation tendency with sertraline treatment.**

| #                                                 | Name                                | Formula       | MW (Database) | error (ppm) | Fold Change (%) <sup>a</sup> | P valor | RSD <sup>b</sup> for QCs (%) | Confirmation MS/MS fragments <sup>c</sup> or % of probability | Mode | Technique |
|---------------------------------------------------|-------------------------------------|---------------|---------------|-------------|------------------------------|---------|------------------------------|---------------------------------------------------------------|------|-----------|
| <b>Amines</b>                                     |                                     |               |               |             |                              |         |                              |                                                               |      |           |
| 1                                                 | Choline                             | C5H13NO       | 103.0997      | 2.8         | 1451.4                       | 0.002   | 7.2                          | identified                                                    | ESI+ | CE-MS     |
| 2                                                 | Phosphocholine                      | C5H14NO4P     | 183.0660      | -3.5        | -74.9                        | 0.002   | 5.5                          | 60.0814/86.0945/124.9996/184.0726                             | ESI+ | LC-MS     |
| 3                                                 | Putrescine                          | C4H12N2       | 88.1000       | 4.6         | -64.0                        | 0.002   | 3.0                          | identified                                                    | ESI+ | CE-MS     |
| <b>Amino acids, peptides, and analogues (AAs)</b> |                                     |               |               |             |                              |         |                              |                                                               |      |           |
| 4                                                 | Glutathione (GSH)                   | C10H17N3O6S   | 307.0838      | -1.0        | 10168.1                      | 0.002   | 24.7                         | identified                                                    | ESI+ | CE-MS     |
| 5                                                 | Glutathione disulfide (GSSH)        | C20H32N6O12S2 | 612.1520      | 1.7         | 108.6                        | 0.002   | 8.5                          | identified                                                    | ESI+ | CE-MS     |
| 6                                                 | Lysine                              | C6H14N2O2     | 146.1055      | 0.7         | 57.4                         | 0.002   | 4.9                          | identified                                                    | ESI+ | CE-MS     |
| 7                                                 | Histidine                           | C6H9N3O2      | 155.0695      | 0.0         | 35.1                         | 0.002   | 5.9                          | identified                                                    | ESI+ | CE-MS     |
| 8                                                 | Proline                             | C5H9NO2       | 115.0633      | 2.6         | -99.7                        | 0.002   | 3.2                          | identified                                                    | ESI+ | CE-MS     |
| 9                                                 | Asparagine                          | C4H8N2O3      | 132.0535      | 5.3         | -82.9                        | 0.002   | 4.7                          | identified                                                    | ESI+ | CE-MS     |
| 10                                                | Arginine                            | C6H14N4O2     | 174.1117      | 0.6         | -76.9                        | 0.002   | 2.5                          | identified                                                    | ESI+ | CE-MS     |
| 11                                                | Alanine/Sarcosine/ $\beta$ Alanine  | C3H7NO2       | 89.0477       | 5.6         | -71.3                        | 0.002   | 5.1                          | Putative 79%                                                  | ESI+ | CE-MS     |
| 12                                                | Glutamate                           | C5H9NO4       | 147.0532      | 2.0         | -64.5                        | 0.002   | 3.1                          | identified                                                    | ESI+ | CE-MS     |
| 13                                                | Aspartate                           | C4H7NO4       | 133.0375      | 0.0         | -63.7                        | 0.002   | 2.5                          | identified                                                    | ESI+ | CE-MS     |
| 14                                                | Leucine/ Isoleucine                 | C6H13NO2      | 131.0946      | 0.7         | -61.5                        | 0.002   | 5.1                          | identified                                                    | ESI+ | CE-MS     |
| 15                                                | Valine                              | C5H11NO2      | 117.0790      | 0.0         | -61.2                        | 0.002   | 4.2                          | identified                                                    | ESI+ | CE-MS     |
| 16                                                | Serine                              | C3H7NO3       | 105.0426      | 4.7         | -59.9                        | 0.002   | 4.3                          | identified                                                    | ESI+ | CE-MS     |
| 17                                                | Trypanothione disulfide             | C27H47N9O10S2 | 721.2887      | 0.3         | -55.3                        | 0.065   | 8.99                         | identified                                                    | ESI+ | CE-MS     |
| 18                                                | Cystathionine                       | C7H14N2O4S    | 222.0674      | -8.5        | -50.5                        | 0.002   | 4.3                          | identified                                                    | ESI+ | CE-MS     |
| 19                                                | Methionine                          | C5H11NO2S     | 149.0510      | 0.7         | -48.4                        | 0.002   | 7.0                          | identified                                                    | ESI+ | CE-MS     |
| 20                                                | Tyrosine                            | C9H9NO3       | 181.0739      | -0.6        | -29.7                        | 0.002   | 7.4                          | identified                                                    | ESI+ | CE-MS     |
| <b>Carbohydrates (Carbs)</b>                      |                                     |               |               |             |                              |         |                              |                                                               |      |           |
| 21                                                | Mannitol                            | C6H14O6       | 182.0790      | -6.0        | 150.4                        | 0.002   | 5.4                          | 43.0165/59.0136/71.0154/89.0269/101.0222/181.0701             | ESI- | LC-MS     |
| 22                                                | disaccharide-phosphate              | C12H23O14P    | 422.0825      | -2.1        | 106.6                        | 0.002   | 6.7                          | 78.9573/96.9662/241.0121/421.0892                             | ESI- | LC-MS     |
| 23                                                | glycerol-phosphate monosaccharid C6 | C9H19O11P     | 334.0665      | -0.9        | 73.0                         | 0.002   | 7.0                          | 78.9574/92.9240/94.9256/96.9194/152.9942/241.0136/333.0598    | ESI- | LC-MS     |

continue

**Table S2. Compounds identified with statistical significance and their variation tendency with sertraline treatment.**

| #                          | Name                                                            | Formula   | MW (Database) | error (ppm) | Fold Change (%) <sup>a</sup> | p valor | RSD <sup>b</sup> for QCs (%) | Confirmation MS/MS fragments <sup>c</sup> or % of probability                                                                         | Mode | Technique |
|----------------------------|-----------------------------------------------------------------|-----------|---------------|-------------|------------------------------|---------|------------------------------|---------------------------------------------------------------------------------------------------------------------------------------|------|-----------|
| 24                         | Sedoheptulose 7-phosphate/<br>glycero-manno-Heptose 7-phosphate | C7H15O10P | 290.0403      | -3.1        | -77.4                        | 0.009   | 6.7                          | Putative 85.17                                                                                                                        | ESI- | LC-MS     |
| 25                         | Hexose-phosphate                                                | C6H13O9P  | 260.0297      | -3.1        | -39.4                        | 0.009   | 10.5                         | 78.9583/ <u>96.9689</u> /138.9969/198.9521/<br>259.0703                                                                               | ESI- | LC-MS     |
| <b>Fatty acids (FFAAs)</b> |                                                                 |           |               |             |                              |         |                              |                                                                                                                                       |      |           |
| 26                         | Octadecenal/Octadecen-11-one/<br>octadecadien-1-ol              | C18H34O   | 266.2610      | -5.5        | 830.7                        | 0.002   | 27.6                         | Putative 72.46                                                                                                                        | ESI+ | LC-MS     |
| 27                         | Arachidonate (C20:4)                                            | C20H32O2  | 304.2402      | -4.6        | 169.9                        | 0.002   | 6.2                          | 41.9964/59.0109/112.9954/205.1859/<br><u>259.2409/285.2442/303.2336</u>                                                               | ESI- | LC-MS     |
| 28                         | Hexadecanoic acid (palmitic<br>acid) (C16:0)                    | C16H32O2  | 256.2402      | -1.2        | 115.2                        | 0.009   | 7.7                          | <u>255.231</u>                                                                                                                        | ESI- | LC-MS     |
| 29                         | 12-methyl myristic acid (C14:0<br>CH3)                          | C15H30O2  | 242.2246      | -7.4        | 39.5                         | 0.041   | 6.3                          | 223.2077/ <u>241.214</u>                                                                                                              | ESI- | LC-MS     |
| 30                         | Linolenic Acid (C18:3)                                          | C18H30O2  | 278.2246      | -1.1        | -72.0                        | 0.002   | 5.5                          | 59.0132/259.2047/277.2163                                                                                                             | ESI- | LC-MS     |
| 31                         | Stearidonate (C18:4)                                            | C18H28O2  | 276.2089      | -4.7        | -67.3                        | 0.002   | 7.4                          | 59.0023/231.1190/257.1843/ <u>275.197</u><br><u>2</u>                                                                                 | ESI- | LC-MS     |
| 32                         | linoleate (C18:2)                                               | C18H32O2  | 280.2402      | -1.1        | -51.2                        | 0.002   | 6.2                          | <u>59.0111/71.0119/279.2314*</u>                                                                                                      | ESI- | LC-MS     |
| 33                         | Eicosatrienoic Acid (ETA,<br>C20:3)                             | C20H34O2  | 306.2559      | -5.2        | -49.0                        | 0.002   | 7.8                          | 59.3451/83.0456/287.2246/ <u>305.2515</u>                                                                                             | ESI- | LC-MS     |
| 34                         | (4,7,10,13,16,19)-<br>Docosahexaenoic acid (C22:6)              | C22H32O2  | 328.2402      | -0.9        | -24.4                        | 0.015   | 5.2                          | 59.0131/67.0533/83.0537/93.0627/10<br>7.0826/121.0931/135.1151/149.1313/<br>161.1340/175.1448/229.2013/355.20<br>49/283.2364/327.1769 | ESI- | LC-MS     |
| 35                         | Oleate (C18:1)                                                  | C18H34O2  | 282.2559      | -3.9        | -16.7                        | 0.026   | 6.2                          | <u>281.2478</u>                                                                                                                       | ESI- | LC-MS     |
| 36                         | 7,10,13,16,19-docosapentaenoic<br>acid (C22:5)                  | C22H34O2  | 330.2559      | -2.1        | -16.0                        | 0.041   | 4.6                          | Putative 93.93                                                                                                                        | ESI- | LC-MS     |

continue

**Table S2. Compounds identified with statistical significance and their variation tendency with sertraline treatment.**

| #                                      | Name                | Formula     | MW (Database) | error (ppm) | Fold Change (%) <sup>a</sup> | p valor | RSD <sup>b</sup> for QCs (%) | Confirmation MS/MS fragments <sup>c</sup> or % of probability                  | Mode | Technique |
|----------------------------------------|---------------------|-------------|---------------|-------------|------------------------------|---------|------------------------------|--------------------------------------------------------------------------------|------|-----------|
| <b>Glycerolipids (GLs)<sup>d</sup></b> |                     |             |               |             |                              |         |                              |                                                                                |      |           |
| 37                                     | PA(10:0/10:0)       | C23H45O8P   | 480.2852      | 1.8         | 897.4                        | 0.002   | 20.3                         | Putative 86.17                                                                 | ESI+ | LC-MS     |
| 38                                     | MG(18:1/0:0/0:0)    | C21H40O4    | 356.2927      | -6.1        | 377.9                        | 0.009   | 24.5                         | Putative 61.11                                                                 | ESI+ | LC-MS     |
| 39                                     | PA(18:4/13:0)       | C34H59O8P   | 626.3948      | 4.9         | -58.8                        | 0.002   | 11.8                         | Putative 69.73                                                                 | ESI- | LC-MS     |
| 40                                     | PA(P-16:0/20:5)     | C39H67O7P   | 678.4625      | -4.9        | -40.7                        | 0.004   | 6.9                          | Putative 71.14                                                                 | ESI- | LC-MS     |
| <b>Glycerophospholipids (PLs)</b>      |                     |             |               |             |                              |         |                              |                                                                                |      |           |
| 41                                     | LPS(O-18:0)         | C24H50NO8P  | 511.3274      | -3.7        | 1790.1                       | 0.002   | 8.2                          | Putative 71.11                                                                 | ESI- | LC-MS     |
| 42                                     | LPI(O-16:0)         | C25H51O11P  | 558.3169      | -3.8        | 1768.8                       | 0.002   | 10.1                         | 78.9564/241.0099/377.2430/557.3109                                             | ESI- | LC-MS     |
| 43                                     | LPE(P-16:0)         | C21H44NO6P  | 437.2906      | -3.7        | 608.8                        | 0.002   | 13.5                         | 78.9586/140.0107/196.0373/239.2359/375.2270/436.2809                           | ESI- | LC-MS     |
| 44                                     | LPC(18:0)/LPE(21:0) | C26H54NO7P  | 523.3638      | -4.7        | 165.7                        | 0.002   | 7.9                          | Putative 87.12                                                                 | ESI+ | LC-MS     |
| 45                                     | LPC(16:0)/LPE(19:0) | C24H50NO7P  | 495.3325      | -6.2        | 88.9                         | 0.002   | 14.9                         | Putative 92.93                                                                 | ESI+ | LC-MS     |
| 46                                     | LPE-Cer(d14:2/16:0) | C32H63N2O6P | 602.4424      | 7.5         | 56.2                         | 0.009   | 7.6                          | Putative 76.66                                                                 | ESI- | LC-MS     |
| 47                                     | LPE(18:1)           | C23H46NO7P  | 479.3012      | -1.7        | -84.1                        | 0.002   | 13.1                         | 78.9609/140.0097/196.0366/214.0465/281.2476/478.2949                           | ESI- | LC-MS     |
| 48                                     | LPS(22:2)           | C28H52NO9P  | 577.3380      | -4.8        | -83.4                        | 0.002   | 23.0                         | Putative 79.71                                                                 | ESI- | LC-MS     |
| 49                                     | LPS(20:3)           | C26H46NO9P  | 547.2910      | -7.9        | -82.2                        | 0.002   | 11.3                         | Putative 72.33                                                                 | ESI- | LC-MS     |
| 50                                     | LPC(18:3)           | C26H48NO7P  | 517.3168      | 4.0         | -81.6                        | 0.002   | 18.0                         | 60.0813/86.0964/104.1072/124.9993/166.0617/184.0729/258.1081/500.3111/518.3229 | ESI+ | LC-MS     |
| 51                                     | LPC(18:4)           | C26H46NO7P  | 515.3012      | 0.6         | -81.0                        | 0.002   | 16.0                         | Putative 97.82                                                                 | ESI+ | LC-MS     |
| 52                                     | LPC (17:3)          | C25H46NO7P  | 503.3012      | 0.0         | -80.6                        | 0.002   | 18.7                         | 60.0825/86.0951/104.1071/184.0716/258.1044/486.2999                            | ESI+ | LC-MS     |
| 53                                     | LPC(19:3)           | C27H50NO7P  | 531.3325      | -5.9        | -78.0                        | 0.002   | 16.5                         | 60.0793/86.0975/104.1063/124.9928/166.0549/184.0713/514.3202/532.3392          | ESI+ | LC-MS     |
| 54                                     | LPE(18:2)           | C23H44NO7P  | 477.2856      | 2.8         | -73.2                        | 0.002   | 12.6                         | 62.0611/81.0694/95.0849/216.0532/263.02348/306.2734/337.2719/478.3040          | ESI+ | LC-MS     |

continue

**Table S2. Compounds identified with statistical significance and their variation tendency with sertraline treatment.**

| #                                              | Name                            | Formula    | MW (Database) | error (ppm) | Fold Change (%) <sup>a</sup> | p valor | RSD <sup>b</sup> for QCs (%) | Confirmation MS/MS fragments <sup>c</sup> or % of probability                          | Mode | Technique |
|------------------------------------------------|---------------------------------|------------|---------------|-------------|------------------------------|---------|------------------------------|----------------------------------------------------------------------------------------|------|-----------|
| 55                                             | LPC(20:3)                       | C28H52NO7P | 545.3481      | -5.4        | -73.0                        | 0.002   | 17.6                         | Putative 84.76                                                                         | ESI+ | LC-MS     |
| 56                                             | LPE(18:3)                       | C23H42NO7P | 475.2699      | -2.1        | -72.2                        | 0.002   | 13.7                         | Putative 95.07                                                                         | ESI- | LC-MS     |
| 57                                             | LPS(20:5)                       | C26H42NO9P | 543.2597      | -8.8        | -70.9                        | 0.002   | 11.9                         | Putative 71.55                                                                         | ESI- | LC-MS     |
| 58                                             | Glycerophosphocholine           | C8H20NO6P  | 257.1028      | -0.4        | -69.0                        | 0.002   | 15.2                         | Putative 94%                                                                           | ESI+ | CE-MS     |
| 59                                             | LPC(18:2)                       | C26H50NO7P | 519.3325      | 3.8         | -68.3                        | 0.002   | 18.7                         | Putative 94.55                                                                         | ESI+ | LC-MS     |
| 60                                             | LPC/LPE                         | C44H74NO8P | 775.5152      | 2.8         | -67.8                        | 0.002   | 16.4                         | Putative 73.5                                                                          | ESI+ | LC-MS     |
| 61                                             | LPS(22:1)                       | C28H54NO9P | 579.3536      | -4.7        | -66.3                        | 0.002   | 21.5                         | Putative 67.66                                                                         | ESI- | LC-MS     |
| 62                                             | LPC(20:2)                       | C28H54NO7P | 547.3638      | 0.8         | -66.0                        | 0.002   | 19.3                         | Putative 90.99                                                                         | ESI+ | LC-MS     |
| 63                                             | LPC(20:4)                       | C28H50NO7P | 543.3325      | 0.3         | -61.7                        | 0.002   | 17.5                         | Putative 88.23                                                                         | ESI+ | LC-MS     |
| 64                                             | LPS(20:1)                       | C26H50NO9P | 551.3223      | -3.6        | -58.7                        | 0.002   | 25.8                         | Putative 75.53                                                                         | ESI- | LC-MS     |
| 65                                             | LPE(22:5)                       | C27H46NO7P | 527.3012      | -5.3        | -58.3                        | 0.002   | 8.9                          | 62.0579/81.0677/95.0851/119.0852/133.0908/173.0171/229.1859/320.2473/387.2840/528.3361 | ESI+ | LC-MS     |
| 66                                             | LPC(16:1)                       | C24H48NO7P | 493.3168      | 0.1         | -57.5                        | 0.002   | 20.0                         | 86.0991/104.1068/184.0716/258.1059/476.3124/494.3225                                   | ESI+ | LC-MS     |
| 67                                             | LPE(22:6)                       | C27H44NO7P | 525.2855      | -3.6        | -56.0                        | 0.002   | 7.2                          | Putative 90.63                                                                         | ESI- | LC-MS     |
| 68                                             | LPC(20:1)                       | C28H56NO7P | 549.3794      | -6.7        | -55.9                        | 0.002   | 2.5                          | Putative 88.37                                                                         | ESI+ | LC-MS     |
| 69                                             | LPC(22:4)                       | C30H54NO7P | 571.3638      | 1.1         | -52.2                        | 0.002   | 13.9                         | 86.0970/104.1063/124.9961/164.9296/184.0713/554.3669/572.3674                          | ESI+ | LC-MS     |
| 70                                             | LPC(14:0)                       | C22H46NO7P | 467.3012      | -5.1        | -49.2                        | 0.004   | 15.0                         | Putative 88.5                                                                          | ESI+ | LC-MS     |
| 71                                             | LPC(17:1)                       | C25H50NO7P | 507.3325      | -6.5        | -49.0                        | 0.002   | 20.0                         | 86.0936/104.1074/124.9962/184.0713/490.3160/508.3363                                   | ESI+ | LC-MS     |
| 72                                             | LPC(18:1)                       | C26H52NO7P | 521.3481      | -3.9        | -47.1                        | 0.002   | 15.7                         | 86.0971/104.1069/184.0724/258.1089/339.2824/445.2663/504.3114/522.3506                 | ESI+ | LC-MS     |
| 73                                             | LPC(22:6)                       | C30H50NO7P | 567.3325      | 4.2         | -44.9                        | 0.002   | 14.7                         | Putative 98.3                                                                          | ESI+ | LC-MS     |
| 74                                             | LPC(22:5)                       | C30H52NO7P | 569.3481      | -2.9        | -44.8                        | 0.002   | 12.9                         | Putative 90.65                                                                         | ESI+ | LC-MS     |
| <b>Sphingolipids and sphingoid bases (SLs)</b> |                                 |            |               |             |                              |         |                              |                                                                                        |      |           |
| 75                                             | Sphinganine 1-phosphate (C18:0) | C18H40NO5P | 381.2644      | -3.9        | PT                           | 0.002   | 15.5                         | 78.9580/380.2500                                                                       | ESI- | LC-MS     |

continue

**Table S2. Compounds identified with statistical significance and their variation tendency with sertraline treatment.**

| #                                               | Name                                                              | Formula     | MW (Database) | error (ppm) | Fold Change (%) <sup>a</sup> | p valor | RSD <sup>b</sup> for QCs (%) | Confirmation MS/MS fragments <sup>c</sup> or % of probability                       | Mode | Technique |
|-------------------------------------------------|-------------------------------------------------------------------|-------------|---------------|-------------|------------------------------|---------|------------------------------|-------------------------------------------------------------------------------------|------|-----------|
| 76                                              | C16 Sphinganine-1-phosphate (C16:0)                               | C16H36NO5P  | 353.2331      | -4.5        | 2466.4                       | 0.002   | 11.5                         | <u>78.9577</u> /352.2214                                                            | ESI- | LC-MS     |
| 77                                              | Sphingosine (C18:1)                                               | C18H37NO2   | 299.2824      | -8.7        | 417.2                        | 0.002   | 12.0                         | 56.0481/69.0672/83.0872/95.0843/121.0978/252.2596/264.2548/ <u>282.2811</u> /300.28 | ESI+ | LC-MS     |
| 78                                              | Sphinganine (C18:0)                                               | C18H39NO2   | 301.2981      | -5.0        | 363.1                        | 0.002   | 10.9                         | Putative 93.59                                                                      | ESI+ | LC-MS     |
| 79                                              | C16 Sphinganine (C16:0)                                           | C16H35NO2   | 273.2668      | -0.3        | 163.8                        | 0.002   | 14.8                         | Putative 97.97                                                                      | ESI+ | LC-MS     |
| 80                                              | C17 Sphinganine (C17:0)                                           | C17H37NO2   | 287.2824      | -4.6        | -72.8                        | 0.002   | 12.5                         | 57.0721/88.0751/106.0860/288.2874                                                   | ESI+ | LC-MS     |
| <b>Purines/pyrimidines and conjugates (NTs)</b> |                                                                   |             |               |             |                              |         |                              |                                                                                     |      |           |
| 81                                              | S-Adenosyl-L-methionine (Adomet)                                  | C15H22N6O5S | 398.1372      | 4.7         | 103.4                        | 0.002   | 3.1                          | Putative 70%                                                                        | ESI+ | CE-MS     |
| 82                                              | Hypoxanthine                                                      | C5H4N4O     | 136.0385      | 0.0         | -11.7                        | 0.041   | 4.9                          | identified                                                                          | ESI+ | CE-MS     |
| <b>Others</b>                                   |                                                                   |             |               |             |                              |         |                              |                                                                                     |      |           |
| 83                                              | Pipecolate                                                        | C6H11NO2    | 129.0790      | -0.8        | 543.7                        | 0.002   | 7.6                          | identified                                                                          | ESI+ | CE-MS     |
| 84                                              | Aminoimidazole ribotide                                           | C8H14N3O7P  | 295.0569      | 1.9         | -99.3                        | 0.002   | 17.7                         | Putative 69.76                                                                      | ESI+ | LC-MS     |
| 85                                              | Imidazole lactate                                                 | C6H8N2O3    | 156.0535      | 1.9         | -90.4                        | 0.002   | 4.3                          | identified                                                                          | ESI+ | CE-MS     |
| 86                                              | Succinate                                                         | C4H6O4      | 118.0266      | 0.8         | -82.4                        | 0.002   | 16.5                         | identified                                                                          | ESI+ | CE-MS     |
| 87                                              | 17 $\beta$ -Hydroxysteroid/Androstan-3 $\alpha$ ,17 $\beta$ -diol | C19H32O2    | 292.2402      | -6.2        | -71.5                        | 0.002   | 10.9                         | Putative 82.17                                                                      | ESI- | LC-MS     |
| 88                                              | Phenyllactate                                                     | C9H10O3     | 166.0629      | -4.2        | PCTL                         | 0.002   | 7.9                          | 72.9910/91.0491/103.0537/119.0465/ <u>147.0411</u> /165.0578                        | ESI- | LC-MS     |

<sup>#</sup> Metabolite number assigned for correspondence with Figure 7.

<sup>a</sup> +increase or –decrease in treated related to untreated

<sup>b</sup> Relative standard deviation.

<sup>c</sup> Underlined number refers to the most abundant fragment observed.

d Abbreviations for lipids: LPC: lysophosphatidylcholine; LPE: lysophosphatidylethanolamine; LPI: lysophosphatidylinositol; LPS: lysophosphatidylserine  
MG: monoradylglycerol; PA: phosphatidic acid.
